# Supplementary material for: Iron-catalyzed synthesis of glycine derivatives via carbon–nitrogen bond cleavage using diazoacetate
Source: Royal Society of Chemistry journal article supplement (doi:10.1039/c0cc03781h), 2010-01-01
Supplement: c0cc03781h.pdf [file c0cc03781h.pdf]

## Supplementary Information

### Iron-Catalyzed Synthesis of Glycine Derivatives via Carbon-Nitrogen Bond Cleavage Using Diazoacetate

Yoichiro Kuninobu,\* Mitsumi Nishi, and Kazuhiko Takai\*

*Division of Chemistry and Biochemistry, Graduate School of Natural Science and  
Technology, Okayama University, Tsushima, Kita-ku, Okayama 700-8530, Japan*

**General.** All reactions were carried out in dry solvent under an argon atmosphere. Ethanol was purchased from Wako Pure Chemical Industries and was dried before use. FeCl<sub>3</sub> was purchased from Nacalai Tesque Inc. MnBr<sub>2</sub> was purchased from Kishida Chemical Co. Anilines (**1a**, **1e**, **1g**, **1h**, **1j**, **1k**), ethyl diazoacetate (**2**), thioanisole (**5**), and 2,2,2-trifluoroethanol were purchased from Aldrich Co., Kanto Kagaku Reagent Division, Nacalai Tesque Inc., Tokyo Kasei Kogyo Co., and Wako Pure Chemical Industries. *N,N*-dialkylanilines (**1b**, **1c**, **1d**, **1f**, **1i**, **1k**, **1m**) were prepared by standard *N*-alkylation methods from corresponding anilines and iodoalkanes using K<sub>2</sub>CO<sub>3</sub> as a base. Ammonium salt **4** was prepared according to the literature method from **3a** and methyl iodide.<sup>1</sup>

<sup>1</sup>H (400 MHz) and <sup>13</sup>C (100 MHz) NMR spectra were recorded using a JEOL JNM-LA400 spectrometer. Proton chemical shifts are reported relative to Me<sub>4</sub>Si (CDCl<sub>3</sub>) at δ 0.00 ppm or residual solvent peak (CDCl<sub>3</sub> at δ 7.26 ppm). Carbon chemical shifts are reported relative to CDCl<sub>3</sub> at δ 77.00 ppm. IR spectra were recorded on a SHIMADZU IRAFFINITY-1 100V J.

Glycine derivatives (**3a**, **3b**, **3d** and **3f**) and ethyl 2-(phenylthio)acetate (**6**) were already known. The structures of these reaction products were determined by comparing the spectrum data of these products with those of **3a**,<sup>2</sup> **3b**,<sup>2</sup> **3d**,<sup>3</sup> **3f**<sup>2</sup> and **6**.<sup>4</sup>

***N*-(4-Methylphenyl)-*N*-methylglycine ethyl ester (**3c**).** <sup>1</sup>H NMR (400 MHz, CDCl<sub>3</sub>) δ 1.24 (t, *J* = 7.2 Hz, 3H), 2.24 (s, 3H), 3.03 (s, 3H), 4.02 (s, 2H), 4.16 (q, *J* = 7.2 Hz, 2H), 6.62 (d, *J* =

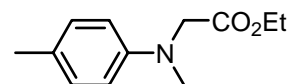

8.4 Hz, 2H), 7.04 (d,  $J = 8.4$  Hz, 2H);  $^{13}\text{C}$  NMR (100 MHz,  $\text{CDCl}_3$ )  $\delta$  14.2, 20.2, 39.6, 54.7, 60.7, 112.6, 126.5, 129.7, 146.8, 171.1; IR (nujol,  $\nu / \text{cm}^{-1}$ ) 1749, 1618, 1521, 1364, 1251, 1190, 1117, 1030, 949, 804; HRMS ( $\text{EI}^+$ ) Calcd for  $\text{C}_{12}\text{H}_{17}\text{NO}_2\text{Na}$  ( $[\text{M}+\text{Na}]^+$ ) 230.1157, Found 230.1153.

***N*-(4-Bromophenyl)-*N*-methylglycine ethyl ester (3e).**  $^1\text{H}$  NMR (400 MHz,  $\text{CDCl}_3$ )  $\delta$  1.24 (t,  $J = 7.2$  Hz, 3H), 3.04 (s, 3H), 4.02 (s, 2H), 4.17 (q,  $J = 7.2$  Hz, 2H), 6.55 (d,  $J = 9.0$  Hz, 2H), 7.30 (d,  $J = 9.0$  Hz, 2H);  $^{13}\text{C}$  NMR (100 MHz,  $\text{CDCl}_3$ )  $\delta$  14.2, 39.6, 54.4, 61.0, 109.4, 113.9, 131.8, 147.9, 170.5; IR (nujol,  $\nu / \text{cm}^{-1}$ ) 1765, 1587, 1489, 1277, 1178, 1041, 1009, 905, 818; HRMS ( $\text{EI}^+$ ) Calcd for  $\text{C}_{11}\text{H}_{14}\text{BrNO}_2\text{Na}$  ( $[\text{M}+\text{Na}]^+$ ) 294.0106, Found 294.0115.

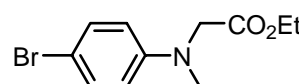

***N*-(3-Methylphenyl)-*N*-methylglycine ethyl ester (3g).**  $^1\text{H}$  NMR (400 MHz,  $\text{CDCl}_3$ )  $\delta$  1.24 (t,  $J = 7.2$  Hz, 3H), 2.30 (s, 3H), 3.05 (s, 3H), 4.04 (s, 2H), 4.17 (q,  $J = 7.2$  Hz, 2H), 6.48-6.53 (m, 2H), 6.57 (d,  $J = 7.2$  Hz, 1H), 7.11 (t, 1H);  $^{13}\text{C}$  NMR (100 MHz,  $\text{CDCl}_3$ )  $\delta$  14.2, 21.9, 39.5, 54.5, 60.8, 109.5, 113.1, 118.3, 129.0, 138.8, 149.0, 171.1; IR (nujol,  $\nu / \text{cm}^{-1}$ ) 1749, 1734, 1653, 1604, 1583, 1560, 1499, 1182, 1121, 1031, 953, 765; HRMS ( $\text{EI}^+$ ) Calcd for  $\text{C}_{12}\text{H}_{17}\text{NO}_2\text{Na}$  ( $[\text{M}+\text{Na}]^+$ ) 230.1157, Found 230.1155.

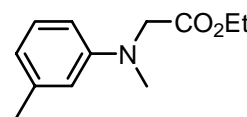

***N*-(2-Methylphenyl)-*N*-methylglycine ethyl ester (3h).**  $^1\text{H}$  NMR (400 MHz,  $\text{CDCl}_3$ )  $\delta$  1.25 (t,  $J = 7.2$  Hz, 3H), 2.31 (s, 3H), 2.87 (s, 3H), 3.72 (s, 2H), 4.17 (q,  $J = 7.2$  Hz, 2H), 6.96 (t,  $J = 7.2$  Hz, 1H), 7.08-7.18 (m, 3H);  $^{13}\text{C}$  NMR (100 MHz,  $\text{CDCl}_3$ )  $\delta$  14.2, 18.3, 41.4, 57.4, 60.5, 120.2, 123.0, 126.3, 131.2, 132.0, 150.7, 170.9; IR (nujol,  $\nu / \text{cm}^{-1}$ ) 1751, 1734, 1654, 1599, 1560, 1493, 1449, 1375, 1261, 1186, 1101, 1031, 947, 766, 725; HRMS ( $\text{EI}^+$ ) Calcd for  $\text{C}_{12}\text{H}_{17}\text{NO}_2\text{Na}$  ( $[\text{M}+\text{Na}]^+$ ) 230.1157, Found 230.1149.

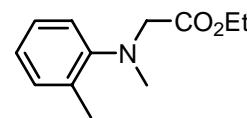

***N*-(2-Naphthyl)-*N*-methylglycine ethyl ester (3i).**  $^1\text{H}$  NMR (400 MHz,  $\text{CDCl}_3$ )  $\delta$  1.26 (t,  $J = 7.2$  Hz, 3H), 3.03 (s, 3H), 3.92 (s, 2H), 4.21 (q,  $J = 7.2$  Hz, 2H), 7.19 (d,  $J = 7.5$  Hz, 1H), 7.39 (t,  $J =$

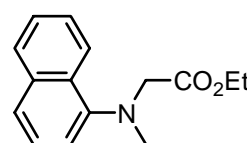

7.5 Hz, 1H), 7.43-7.52 (m, 2H), 7.55 (d,  $J = 7.8$  Hz, 1H), 7.83 (d,  $J = 7.5$  Hz, 1H), 8.22 (d,  $J = 8.7$  Hz, 1H);  $^{13}\text{C}$  NMR (100 MHz,  $\text{CDCl}_3$ )  $\delta$  14.2, 41.7, 58.7, 60.6, 123.4, 123.6, 125.46, 125.50, 125.7, 128.4, 128.6, 134.8, 148.7, 170.8; IR (neat,  $\nu / \text{cm}^{-1}$ ) 3524, 3049, 2937, 2792, 1747, 1717, 1575, 1558, 1506, 1456, 1396, 1192, 1051, 1028, 937, 802, 775; HRMS ( $\text{EI}^+$ ) ( $[\text{M}+\text{Na}]^+$ ) Calcd for  $\text{C}_{15}\text{H}_{17}\text{NO}_2\text{Na}$  ( $\text{M}^+$ ) 266.1157, Found 266.1154.

***N*-Dodecyl-*N*-methylglycine ethyl ester (3j).**

$^1\text{H}$  NMR (400 MHz,  $\text{CDCl}_3$ )  $\delta$  0.88 (t,  $J = 7.2$  Hz, 3H), 1.20-1.35 (m, 18H), 1.40-1.54 (m 2H),

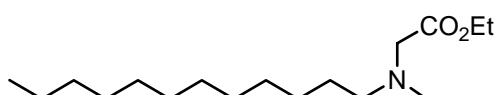

2.36 (s, 3H), 2.46 (t, 2H) 3.23 (s, 2H) 4.19 (q,  $J = 7.2$  Hz, 2H);  $^{13}\text{C}$  NMR (100 MHz,  $\text{CDCl}_3$ )  $\delta$  14.1, 14.3, 22.7, 25.7, 27.4, 31.9, 32.8, 42.5, 57.4, 58.6, 60.4, 171.0; IR (nujol,  $\nu / \text{cm}^{-1}$ ) 2926, 2854, 1867, 1843, 1748, 1732, 1717, 1697, 1681, 1557, 1541, 1506, 1472, 1456, 1435, 1394, 1182, 1034, 721; HRMS ( $\text{EI}^+$ ) Calcd for  $\text{C}_{17}\text{H}_{35}\text{NO}_2\text{Na}$  ( $[\text{M}+\text{Na}]^+$ ) 308.2566, Found 308.2568.

***N*-Ethyl-*N*-phenylglycine ethyl ester (3k).**  $^1\text{H}$  NMR (400 MHz,  $\text{CDCl}_3$ )  $\delta$  1.21 (t,  $J = 7.2$  Hz, 3H), 1.26 (t,  $J = 7.2$  Hz, 3H), 3.48 (q,

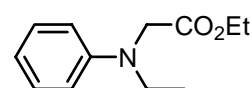

$J = 7.2$  Hz, 2H), 4.01 (s, 2H), 4.20 (q,  $J = 7.2$  Hz, 2H), 6.65 (d,  $J = 8.4$  Hz, 2H), 6.71 (t,  $J = 7.2$  Hz, 1H), 7.22 (t,  $J = 8.4$  Hz, 2H);  $^{13}\text{C}$  NMR (100 MHz,  $\text{CDCl}_3$ )  $\delta$  12.4, 14.2, 46.0, 52.3, 60.9, 112.0, 116.8, 129.2, 147.8, 171.4; IR (neat,  $\nu / \text{cm}^{-1}$ ) 2976, 2930, 1748, 1732, 1697, 1682, 1601, 1558, 1506, 1456, 1394, 1373, 1271, 1186, 1128, 1030, 988, 746, 691; HRMS ( $\text{EI}^+$ ) Calcd for  $\text{C}_{12}\text{H}_{17}\text{NO}_2\text{Na}$  ( $[\text{M}+\text{Na}]^+$ ) 230.1157, found 230.1153.

***N*-(4-Ethoxybutyl)-*N*-phenylglycine ethyl ester (3l).**  $^1\text{H}$  NMR (400 MHz,  $\text{CDCl}_3$ )  $\delta$  1.20 (t,  $J = 7.2$  Hz, 3H), 1.25 (t,  $J = 7.2$  Hz, 3H), 1.60-1.67 (m, 2H), 1.67-1.76 (m, 2H), 3.40-3.50

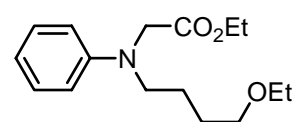

(m, 6H), 4.02 (s, 2H), 4.18 (q,  $J = 7.2$  Hz, 2H), 6.64 (d,  $J = 8.1$  Hz, 2H), 6.71 (t,  $J = 7.2$  Hz, 1H), 7.21 (t, 2H);  $^{13}\text{C}$  NMR (100 MHz,  $\text{CDCl}_3$ )  $\delta$  14.2, 15.2, 24.3, 27.2, 51.9, 52.9, 60.9, 66.2, 70.4, 112.1, 116.9, 129.2, 147.9, 171.3; IR (neat,  $\nu / \text{cm}^{-1}$ ) 2976, 2930, 2859, 1751, 1734, 1655, 1601, 1560, 1501, 1458, 1375, 1261, 1180, 1114, 1029, 746; HRMS ( $\text{EI}^+$ ) Calcd for  $\text{C}_{16}\text{H}_{25}\text{NO}_3\text{Na}$  ( $[\text{M}+\text{Na}]^+$ ) 302.1732, Found 302.1722.

## References

1. E. Lukevics, I. Segal, A. Zablotskaya, S. Germane, *Molecules* 1997, **2**, 180-185.
2. T. Satoh, A. Osawa, T. Ohbayashi, A. Kondo, *Tetrahedron* 2006, **62**, 7892-7901.
3. Z. Su, P. S. Mariano, D. E. Falvey, U. C. Yoon, S. W. Oh, *J. Am. Chem. Soc.* 1998, **120**, 10676-10686.
4. B. C. Ranu, T. Mandal, *J. Org. Chem.* 2004, **69**, 5793-5795.
